# Supplementary material for: The Effect of Guisangyou Tea on Abnormal Lipid Metabolism in Mice Induced by High-Fat Diet
Source: MDPI journal article supplement (doi:10.3390/foods12112171), 2023-05-27
Supplement: s1 [file s1]

Article

# The Effect of Guisangyou Tea on Abnormal Lipid Metabolism in Mice Induced by High-Fat Diet

Yan Zhu <sup>1,†</sup>, Xianghui Zhou <sup>2,†</sup>, Nan Ling <sup>2</sup>, Qiming Yu <sup>2,\*</sup>, Huijuan Wang <sup>1</sup> and Qizhen Du <sup>1,\*</sup>

<sup>1</sup> College of Food and Health Sciences, Zhejiang A & F University, Hangzhou 311300, China; yueliangyan@163.com (Y.Z.); wanghuijuan1016@126.com (H.W.)

<sup>2</sup> College of Public Health, Guilin Medical University, Guilin 541100, China; ZHOUXH\_0472@163.com (X.Z.); lingnan0118@163.com (N.L.)

\* Correspondence: qm\_yu19@glmc.edu.cn (Q.Y.); qizhendu@163.com (Q.D.)

† These authors contributed equally to this work.

## Supplementary Materials

**Table S1.** The nutrient composition of normal diet and high-fat diet.

| Ingredient                    | Normal diet (g) | High-fat diet (g) |
|-------------------------------|-----------------|-------------------|
| Corn starch                   | 397.5           | 227.5             |
| Casein                        | 200             | 200               |
| Dyetrose                      | 132             | 132               |
| Lard                          | 0               | 170               |
| Sucrose                       | 100             | 100               |
| Soybean oil                   | 70              | 70                |
| $\alpha$ -cellulose           | 50              | 50                |
| Minerals mixture <sup>a</sup> | 35              | 35                |
| Vitamins mixture <sup>a</sup> | 10              | 10                |
| DL-Methionine                 | 3               | 3                 |
| Choline bitartrate            | 2.5             | 2.5               |
| Total weight                  | 1000            | 1000              |

<sup>a</sup> Minerals and Vitamins mixture according to AIN-93 diet (Teklad, Madison, WI, USA)

**Table S2.** The mouse organ indexes of the control group (CON), high fat diet group (HFD) and high fat diet-WE treatment group (WE)

| Group | Organ index/%            |                          |                          |                          |
|-------|--------------------------|--------------------------|--------------------------|--------------------------|
|       | Liver                    | Kidney                   | Spleen                   | Heart                    |
| CON   | 3.913±0.143 <sup>b</sup> | 1.223±0.054 <sup>a</sup> | 0.341±0.033 <sup>a</sup> | 0.461±0.025 <sup>a</sup> |
| HFD   | 4.928±0.135 <sup>a</sup> | 1.226±0.128 <sup>a</sup> | 0.322±0.025 <sup>a</sup> | 0.440±0.025 <sup>a</sup> |
| WE    | 4.379±0.164 <sup>b</sup> | 1.218±0.138 <sup>a</sup> | 0.352±0.034 <sup>a</sup> | 0.454±0.024 <sup>a</sup> |

Significant differences between groups are denoted by different letters (P < 0.05).
